# Supplementary material for: Development and validation of the ND10 to measure neck-related functional disability
Source: Springer Nature journal article supplement (doi:10.1186/s12891-022-05556-7), 2022-06-23
Supplement: MOESM3 [file 23199602]

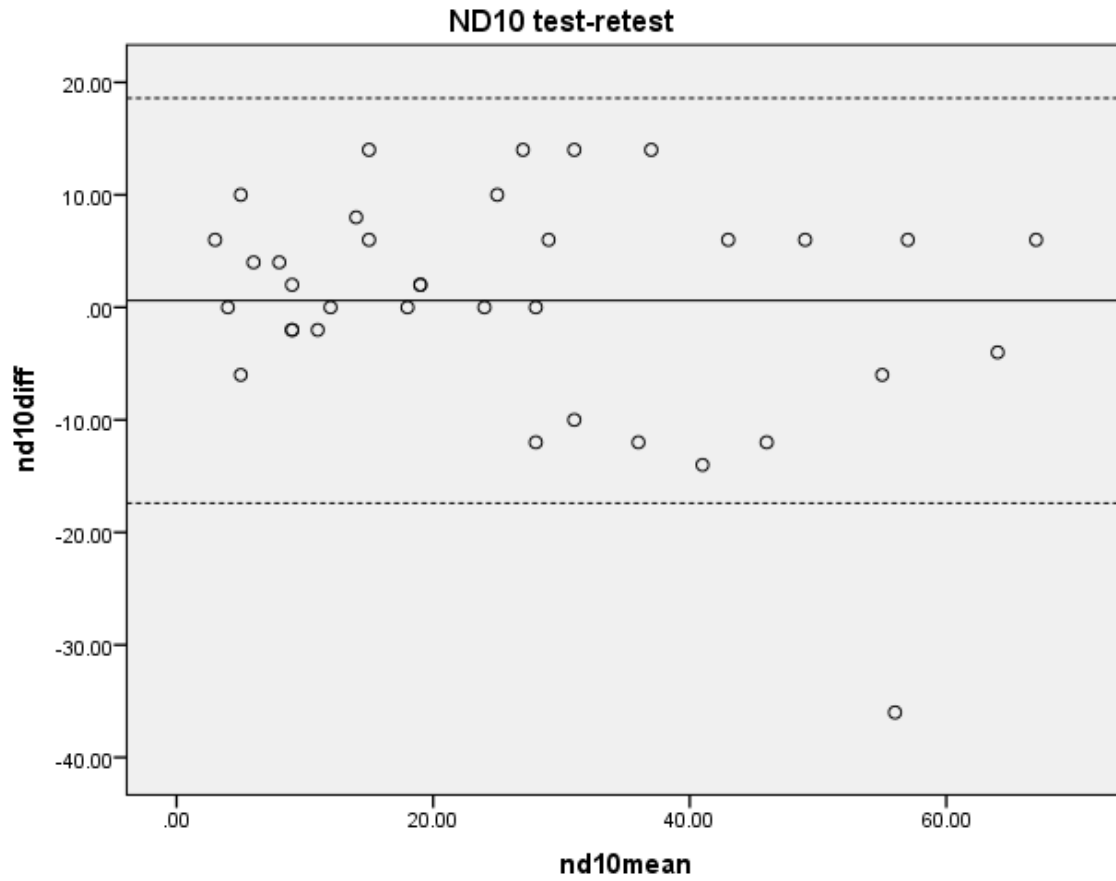

Supplemental Figure A. Bland-Altman graph demonstrating the mean difference in test and retest scores (0.6) and the limits of agreement (18.6 to -17.4)
